# Supplementary material for: Exploiting 4-1BB immune checkpoint to enhance the efficacy of oncolytic virotherapy for diffuse intrinsic pontine gliomas
Source: PubMed Central journal article supplement (PMC9057625; doi:10.1172/jci.insight.154812), 2022-04-08
Supplement: jciinsight-7-154812-s178.pdf [file jciinsight-7-154812-s178.pdf]

1 **Supplementary Materials:**

2

3 **Supplementary material and methods**

4

5 ***Cell viability assay***

6 All the cell lines were seeded in 96-well plates (NP53 and XFM at a density of 500  
7 cell/well and SU-DIPG IV and TP54 at  $1 \times 10^4$  cell/well). Then, the cells were infected  
8 with Delta-24-ACT at MOIs ranging from 5 to 100. Five days after infection, cell viability  
9 was assessed using the CellTiter 96® Aqueous One Solution Cell Proliferation Assay  
10 (Promega, Fitchburg, WI, USA; G3581) as previously described (46). Viability curves  
11 were analyzed using GraphPad Prism 8 (Statistical Software for Sciences) to determine  
12 the IC<sub>50</sub> values of Delta-24-ACT in the tested cell lines (IC<sub>50</sub> is the viral dose at which  
13 50% of cells are affected, i.e., 50% survival).

14 ***qRT-PCR***

15 RNA was extracted with TRIzol at 48 h after cell infection ( $1.5 \times 10^4$  cells/well) with  
16 Delta-24-ACT at MOIs of 50 and 100. Then, cDNA was obtained from 1 µg of RNA by  
17 RT-PCR, and gene expression was analyzed by real-time PCR using Fast SYBR Green  
18 PCR Master Mix (Applied Biosystems). The specific primers were as follows:

19 4-1BBL Fw: 5'CTGTGTTCGCCAAGCTACTG3' and Rv:  
20 5'GGGACTGTCTACCACCAACT3'; GAPDH<sub>mouse</sub>Fw:  
21 5'GGGAAATTCAACGGCACAGT3' and Rv: 5'AGATGGTGATGGGCTTCCC3';  
22 and GAPDH<sub>human</sub>Fw: 5'AGCCACATCGCTCAGACAC3' and Rv:  
23 5'GCCCAATACGACCAAATCC3'.

24 ***Measurement of DAMPs***

25 Each cell line was plated at a density of  $2 \times 10^5$  cells per well (six-well plates) and was  
26 infected with Delta-24-ACT at its corresponding three-day  $IC_{50}$ . At 72 h later, the  
27 concentrations of the DAMP markers—HMGB1 (ST51011; IBL International), and ATP  
28 (ENLITEN® ATP Assay System; FF2000; Promega)—were measured in supernatants of  
29 infected and mock-infected cultures.

### 30 ***Immunoblotting***

31 Cell lysates were obtained by treating the samples with lysis buffer (PBS 1X + 1% Triton  
32 X-100) together with a protease inhibitor for 30 minutes on ice and centrifuging for 20  
33 minutes at 4°C. The protein amount was assessed using a Bradford colorimetric assay  
34 (BCA), and 30 µg of protein were subjected to sodium dodecyl sulfate-tris-glycine gel  
35 electrophoresis and then transferred to nitrocellulose membranes, which were incubated  
36 with the following antibodies: E1A (1:1000, Sc-430 Santa Cruz Biotechnology), fiber  
37 (1:1000, NB600-541 Novus Biologicals), 4-1BBL (1:1000, AF1246 R&D Systems) and  
38 GRB2 (1:1000, 610112 BD). Finally, the membranes were developed according to the  
39 Amersham enhanced chemiluminescence protocol.

### 40 ***Mice for the isogenic system***

41 All injections were performed in mouse pups aged 0–2 days old among equally distributed  
42 sexes for each genotype. *Ntva;Ptenfl/fl;Cdkn2a<sup>-/-</sup>* mice are in a mixed genetic  
43 background while *Ntva;Ptenfl/fl* mice are in a pure C57BL/6 background (Herting *et al.*,  
44 2017). Mice were housed in a climate-controlled, pathogen-free facility with access to  
45 food and water *ad libitum* under a 12-h light/dark cycle. *Ccl2* (#004434) and *Ccl7*  
46 (#017638) knockout mice were obtained from the Jackson Laboratory and crossed to  
47 C57BL/6 *Ntva;Ptenfl/fl* mice until homozygous knockout mice were obtained as  
48 previously described for the generation of *Ntva;Ptenfl/fl;Ccl2<sup>-/-</sup>* mice (Tsou *et al.*, 2007;

49 Chen *et al.*, 2017). *Ccl3* knockout mice were gifted by Dr C. K. Qu, *Ccl8/12<sup>-/-</sup>* mice  
50 were gifted by Dr Sabina Islam, and both were crossed with C57BL/6 *Ntva;Pten<sup>fl/fl</sup>* mice  
51 until homozygous knockout mice were obtained. Genotyping of all mice was performed  
52 using Transnetyx. All experimental procedures were approved by the Institutional Animal  
53 Care and Use Committee of Emory University (Protocol #2003253, #201700633) and  
54 Icahn School of Medicine at Mount Sinai (Protocol #201900619).

### 55 ***Cell culture and mice injections***

56 DF1 cells (ATCC) were grown at 39°C, expanded to passage 4 and transfected with  
57 RCAS-PDGFB-HA, RCAS-shp53-RFP, RCAS-H3.3WT, RCAS-H3.G34R or RCAS-  
58 H3.3K27M using a FuGENE<sup>®</sup> 6 Transfection kit FuGENE 6 Transfection reagent  
59 (Promega, Cat. E2691), accordingly to manufacturer's protocol. Cells were cultured with  
60 DMEM media (Gibco, 11995-065) supplemented with 1× l-glutamine, 1×  
61 penicillin/streptomycin, and 10% fetal bovine serum (FBS) (ATCC). Media containing  
62 2x10<sup>5</sup> DF1 cells transfected with the different construction was injected in the IV ventricle  
63 of 0-2 days old *GFAP-Tva; GFAP-Cre; Rosa26-LSL-Cas9; p53lox/lox* mice using a 30-  
64 gauge needle attached to a Hamilton gas-tight syringe (Fisher Scientific,#14-815-250).  
65 Mice were closely monitored for signs of tumor development and sacrificed when  
66 reaching humane end-point. At this time point, mouse brains were extracted for further  
67 analysis.

### 68 ***Immunophenotyping of the isogenic tumors by flow cytometry***

69 After sacrificing, mice were perfused with ice-cold PBS and whole brains obtained for  
70 processing. Tumors were digested mechanically and enzymatically with 0.4 mg/ml  
71 collagenase (R8757, Merck) and DNaseA (10104159001, Roche) in RPMI + 10% FBS.  
72 Erythrocytes were lysed in presence of RBC lysis buffer (00-4333-57, Labclinics) for 2

73 minutes at room temperature. Then, samples underwent 22% Percoll (17-0891-01, GE  
74 Healthcare) gradient separation to obtain TILs.

75 Cell suspensions were first stained with LIVE/DEAD Fixable Blue Dead Cell Stain  
76 (L34962, Life technologies) to differentiate non-viable cells, and then with 100 µl of the  
77 antibody mix. The used antibodies are listed in the table below (table 2). For FOXP3  
78 staining cells were fixed in True-Nuclear™ fix reagent (424401, Biolegend) and then  
79 permeabilized with True-Nuclear™ permeabilization buffer (424401, Biolegend). Data  
80 was acquired using a LRS Fortessa cytometer.

81 **Table 2. List of the antibodies used for the flow cytometry experiment.**

| ANTIBODY          | CLONE    | DILUTION | COMPANY           | REFERENCE  |
|-------------------|----------|----------|-------------------|------------|
| CD45 PECy7        | 30-F11   | 1:400    | Invitrogen        | 25-0451-82 |
| CD3 APC           | 145-2C11 | 1:100    | BD Pharmingen     | 553066     |
| NK1.1 BV711       | PK136    | 1:100    | Biolegend         | 108745     |
| B220 BUV661       | RA3-6B2  | 1:100    | BD Biosciences    | 612972     |
| CD11b PerCP-Cy5.5 | M1/70    | 1:100    | Invitrogen        | 45-0112-82 |
| F4/80 APC/Fire750 | BM8      | 1:50     | Biolegend         | 123152     |
| CD204 PE          | M204PA   | 1:200    | Invitrogen        | 12-2046-82 |
| CD4 BV510         | RM4-5    | 1:200    | BD Biosciences    | 563106     |
| CD8 FITC          | 53-6.7   | 1:400    | Tonbo Biosciences | 35-0081    |
| CD25 PerCP-Cy5.5  | PC61     | 1:100    | Biolegend         | 102030     |
| FOXP3 PE          | MF-14    | 1:40     | Biolegend         | 126404     |

82

83 **Supplementary Figures:**

Supp\_Figure 1

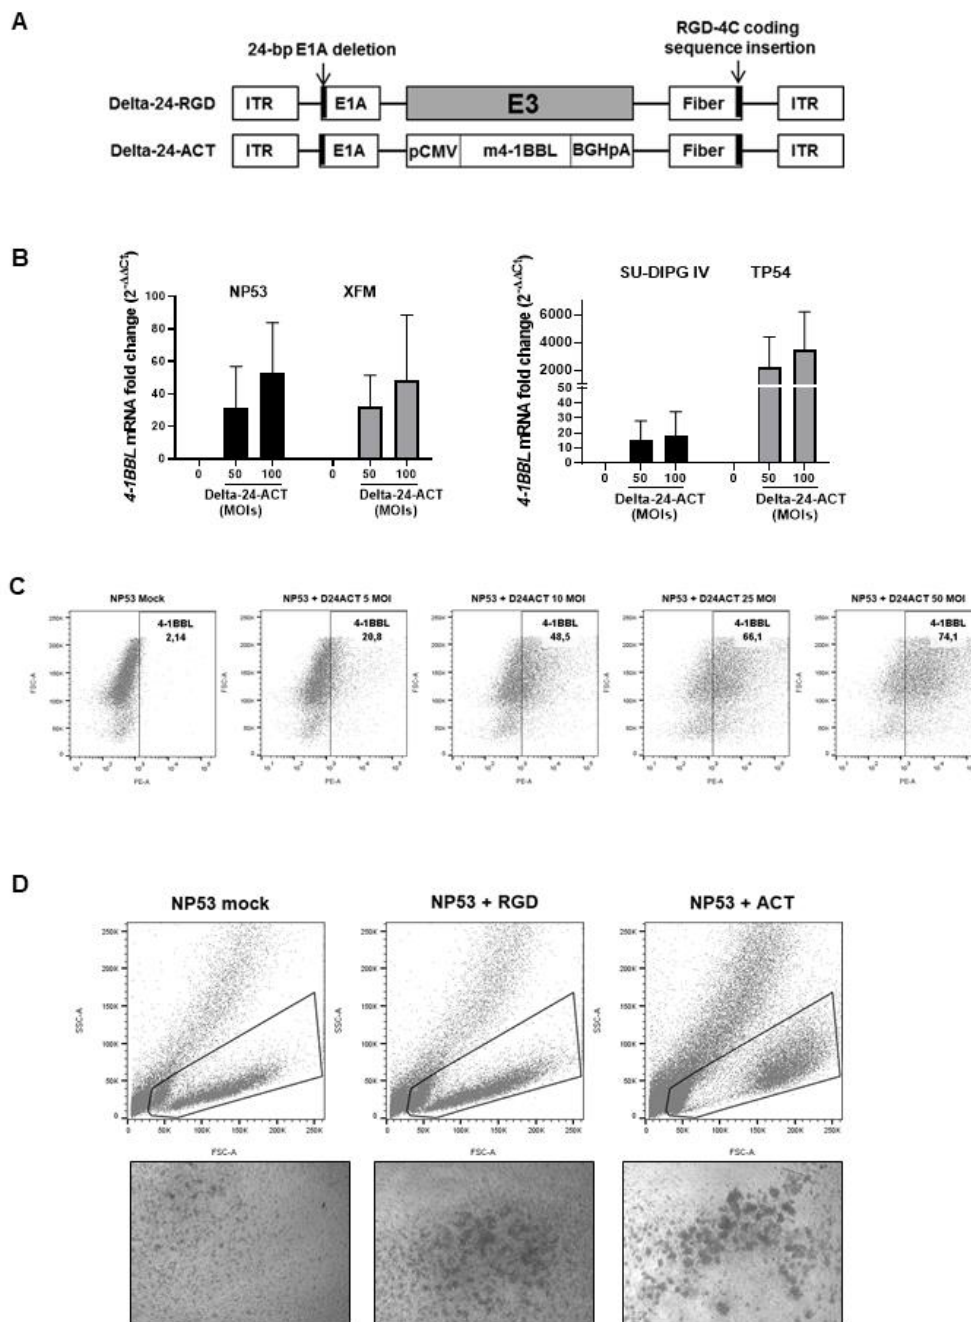

84

85 **Supplementary figure 1. The 4-1BBL expression in DIPG cells after Delta-24-ACT**  
 86 **infection.** (A) Schematic representation of the engineered Delta-24-ACT. (B) The m4-1BBL  
 87 expression as determined by qPCR in NP53 and XFM murine cell lines and SU-DIPG IV and  
 88 TP54 human cell lines after Delta-24-ACT infection at the indicated MOIs. (C) Representative  
 89 images showing the 4-1BBL expression in the membranes of NP53 cells infected with Delta-24-  
 90 ACT at different MOIs for 48 h as determined by flow cytometry. (D) *Upper panel*, representative  
 91 flow cytometry image of CD8<sup>+</sup> lymphocytes cocultured with NP53 and NP53 cells infected with  
 92 Delta-24-RGD or Delta-24-ACT (100 MOI). *Lower panel*, representative images of CD8<sup>+</sup>  
 93 clusters acquired on an inverted microscope.

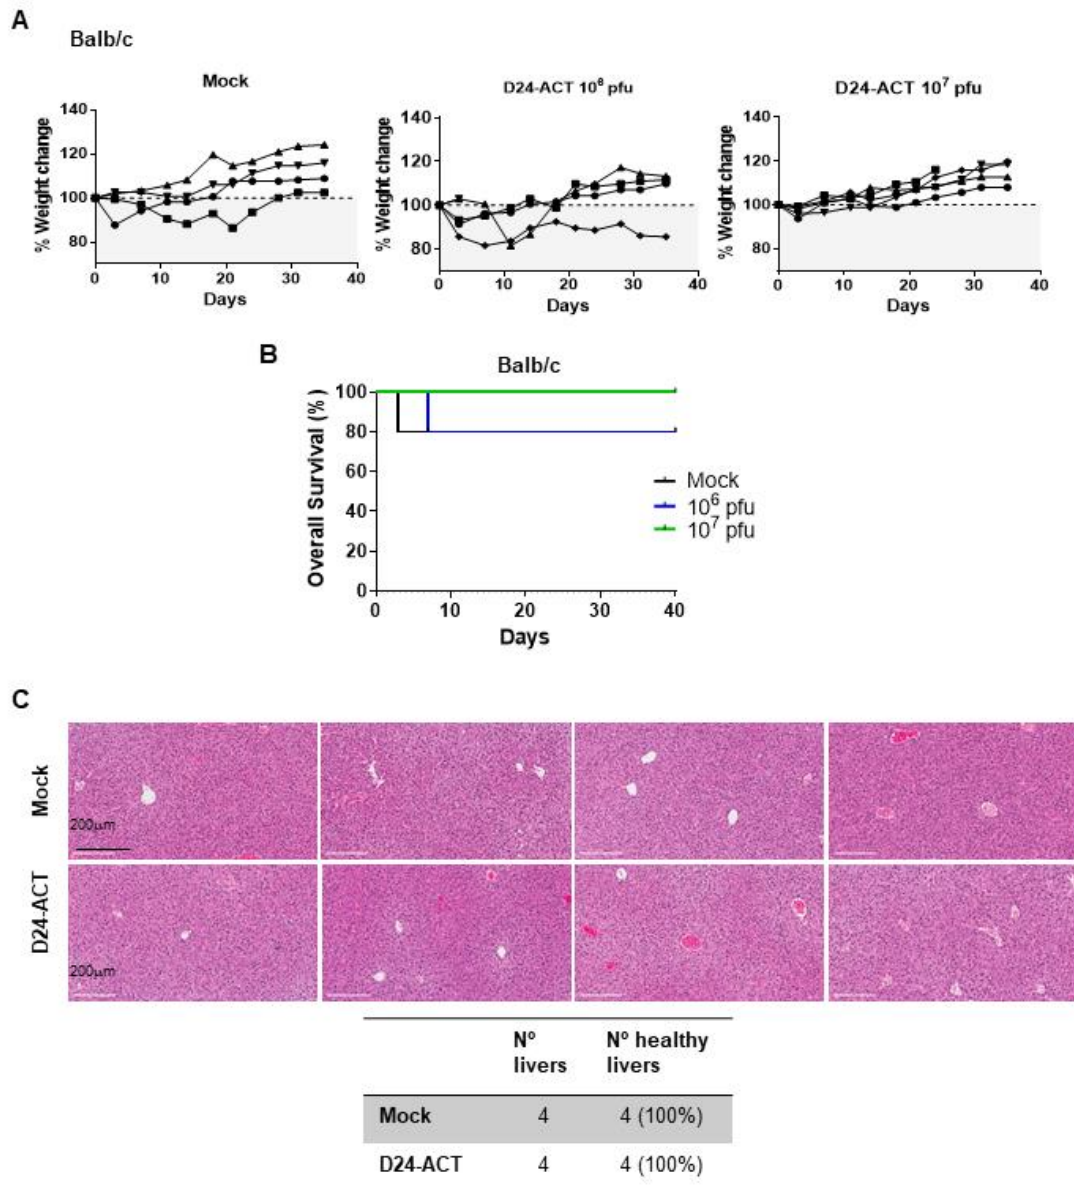

94

95 **Supplementary figure 2. Characterization of Delta-24-ACT toxicity in DIPG murine**  
 96 **models.** (A) Balb/c mice were treated intraparenchymally with mock (PBS) ( $n=5$ ) or Delta-24-  
 97 ACT ( $n=5$ ) at the indicated doses. Mice from the different groups were weighed every 3-4 days  
 98 until the end of the treatment (30 days). (B) Kaplan-Meier survival plot of Balb/c mice treated  
 99 with PBS (control group) and  $10^6$  PFUs or  $10^7$  PFUs of Delta-24-ACT in the pons. (C)  
 100 Representative histological images of the livers of mice bearing orthotopic DIPGs and treated  
 101 locally with Delta-24-ACT at  $10^8$  PFUs. None of the livers analyzed showed hepatic injury.

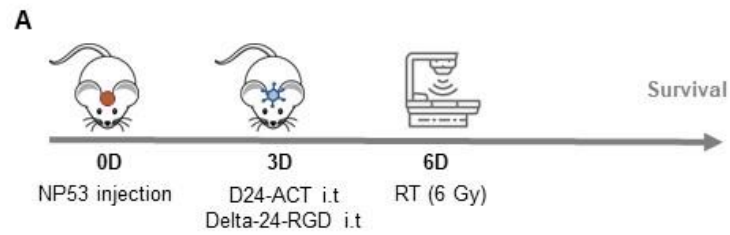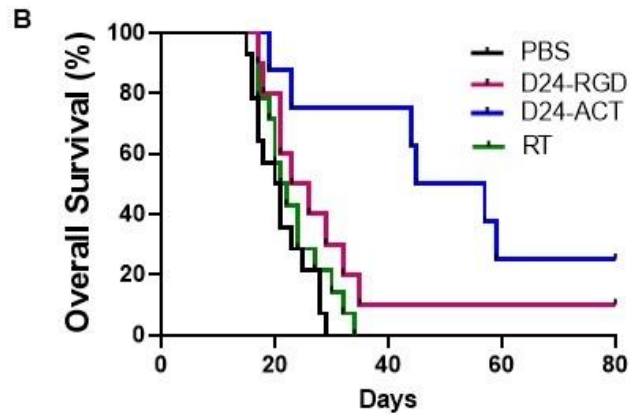

|                               | PBS    | RT   | D24-RGD | D24-ACT |
|-------------------------------|--------|------|---------|---------|
| <b>Median Survival (Days)</b> | 20.5   | 21.5 | 24.5    | 51      |
|                               | NS     |      | 0.0008  |         |
|                               | 0.03   |      |         |         |
|                               | 0.0007 |      |         |         |

102

103 **Supplementary figure 3. Characterization of the anti-tumor effect Delta-24-ACT in DIPG**  
 104 **murine models.** (A) Schedule of survival experiments performed with NP53 comparing the effect  
 105 on survival of viruses Delta-24-RGD and Delta-24-ACT. (B) Kaplan-Meier survival plot of mice  
 106 bearing NP53 cells treated with  $10^6$  PFUs of Delta-24-RGD or Delta-24-ACT or a mock PBS  
 107 control (log-rank;  $P=0.001$ , PBS  $n=14$ ; Delta-24-RGD  $n=10$ ; Delta-24-ACT  $n=8$ ).

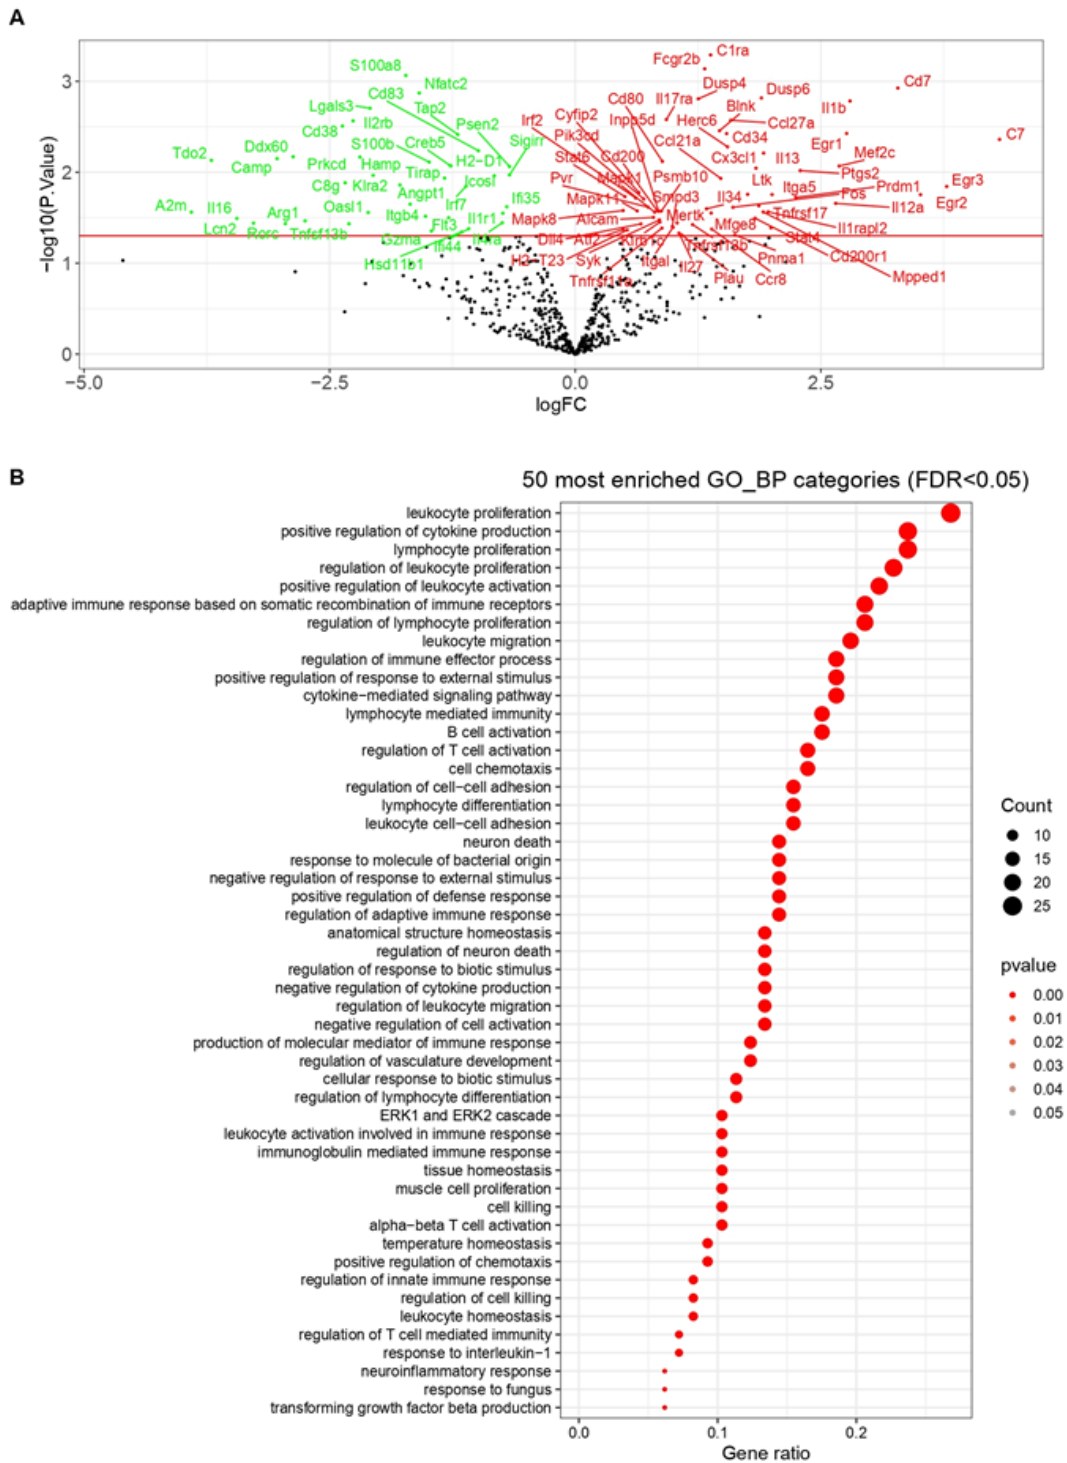

108

109 **Supplementary figure 4. Evaluation of the tumor microenvironment after Delta-24-ACT**  
 110 **treatment in the NP53 orthotopic model. (A)** Volcano plot' of statistical significance against  
 111 fold-change between control-treated and Delta-24-ACT-treated, demonstrating the most  
 112 significantly differentially expressed genes. **(B)** Graph representing the 50 GO-biological  
 113 processes enriched in Delta-24-ACT-treated animals versus control-treated.



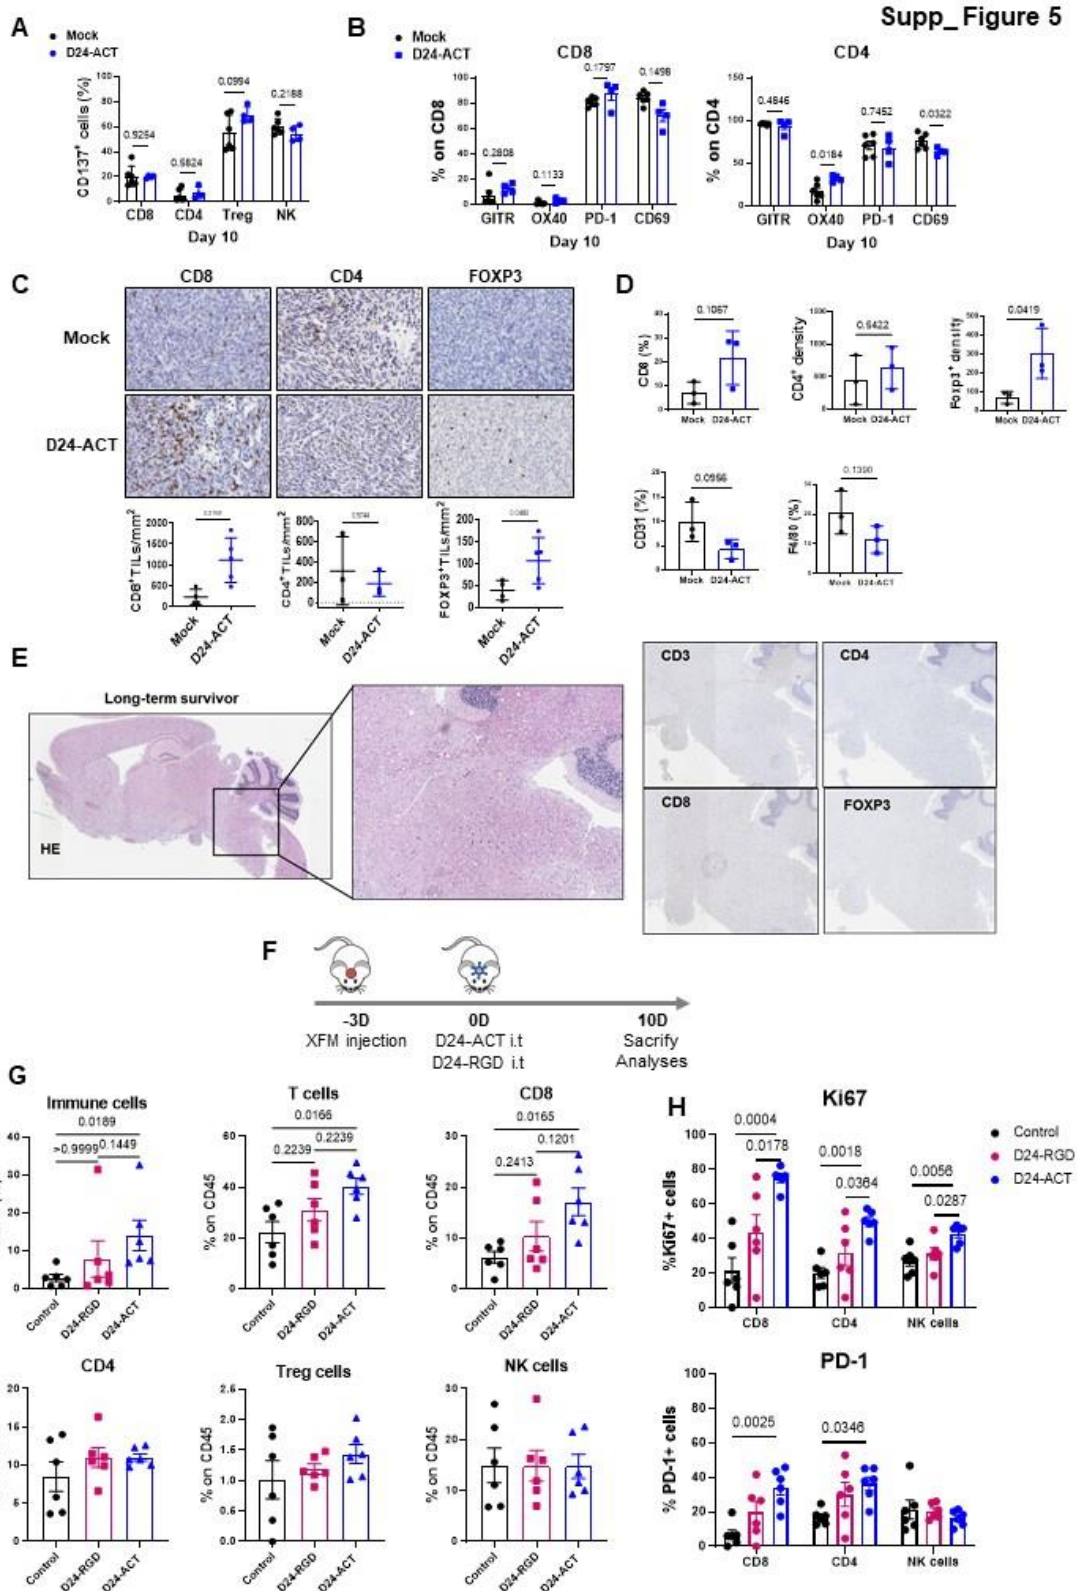

114  
115  
116  
117  
118  
119  
120

**Supplementary figure 5. Modulation of the tumor microenvironment by Delta-24-ACT in the NP53 and XFM orthotopic models.** (A) CD137 expression (%) in T cell populations and NK cells 10 days after viral treatment. Multiple t-test was performed ( $n=4/6$ ) (B) Flow cytometry analyses of different activation (GITR, OX40, CD69) and exhaustion (PD-1) markers were performed on the CD4<sup>+</sup> and CD8<sup>+</sup> cell subsets 10 days after viral administration in NP53-bearing mice. The bars indicate the mean  $\pm$  SD ( $n=6$ )

121 PBS,  $n=4$  D24-ACT) Multiple  $t$ -test. **(C) Upper panel**, representative images (scale bar,  
122 100  $\mu\text{m}$ ) of CD4, CD8, and FOXP3 immunostaining of DIPG tumors from control and  
123 Delta-24-ACT-treated mice. **Lower panel**, quantification of positive CD4<sup>+</sup>, CD8<sup>+</sup>, and  
124 FOXP3<sup>+</sup> cell infiltration per  $\text{mm}^2$  of DIPG tumors. Graph showing the quantification of  
125 positive cell infiltration at 15 days after cell implantation per  $\text{mm}^2$  of tumors treated with  
126 either PBS or Delta-24-ACT ( $n=3-5$ ). P values were calculated by the two-tailed  
127 Student's  $t$  test. **(D)** The brains of mice bearing NP53 cells were subjected to multiplexed  
128 immunofluorescence analysis to detect the following immune cell markers: CD8 (light  
129 blue), CD4 (green), Foxp3 (yellow), CD31 (orange), F4/80 (red), and GFAP (pink).  
130 Nuclei were counterstained with DAPI (blue). Quantification of the different immune  
131 populations at 15 days after treatment ( $n=3$ ). **(E)** Representative micrographs of a NP53  
132 long-term survivor showing H&E and CD3, CD4, CD8, and FOXP3 immunostaining of  
133 DIPG tumors from Delta-24-ACT-treated mice subjected to a rechallenge. **(F)** Schedule  
134 of mechanistic studies in the XFM model. XFM cells were engrafted (day -3), and the  
135 animals were treated with either a mock control, Delta-24-ACT or Delta-24-RGD ( $10^6$   
136 PFUs) three days later. The animals were sacrificed ten days (10D) later, and the different  
137 immune populations were assessed. **(G)** Flow cytometry analyses of different immune  
138 cell populations in the brains of mice bearing XFM tumors 10 days after treatment with  
139 Delta-24-ACT (blue), Delta-24-RGD (magenta) or PBS (black). The bars indicate the  
140 mean  $\pm$  SD ( $n=6$ ), One-way ANOVA. **(H)** Flow cytometry analyses of Ki67 proliferation  
141 and PD-1 exhaustion markers were performed in the CD8, CD4 and NK cell subsets 10  
142 days after viral administration. The bars indicate the mean  $\pm$  SD ( $n=6$ ).  
143

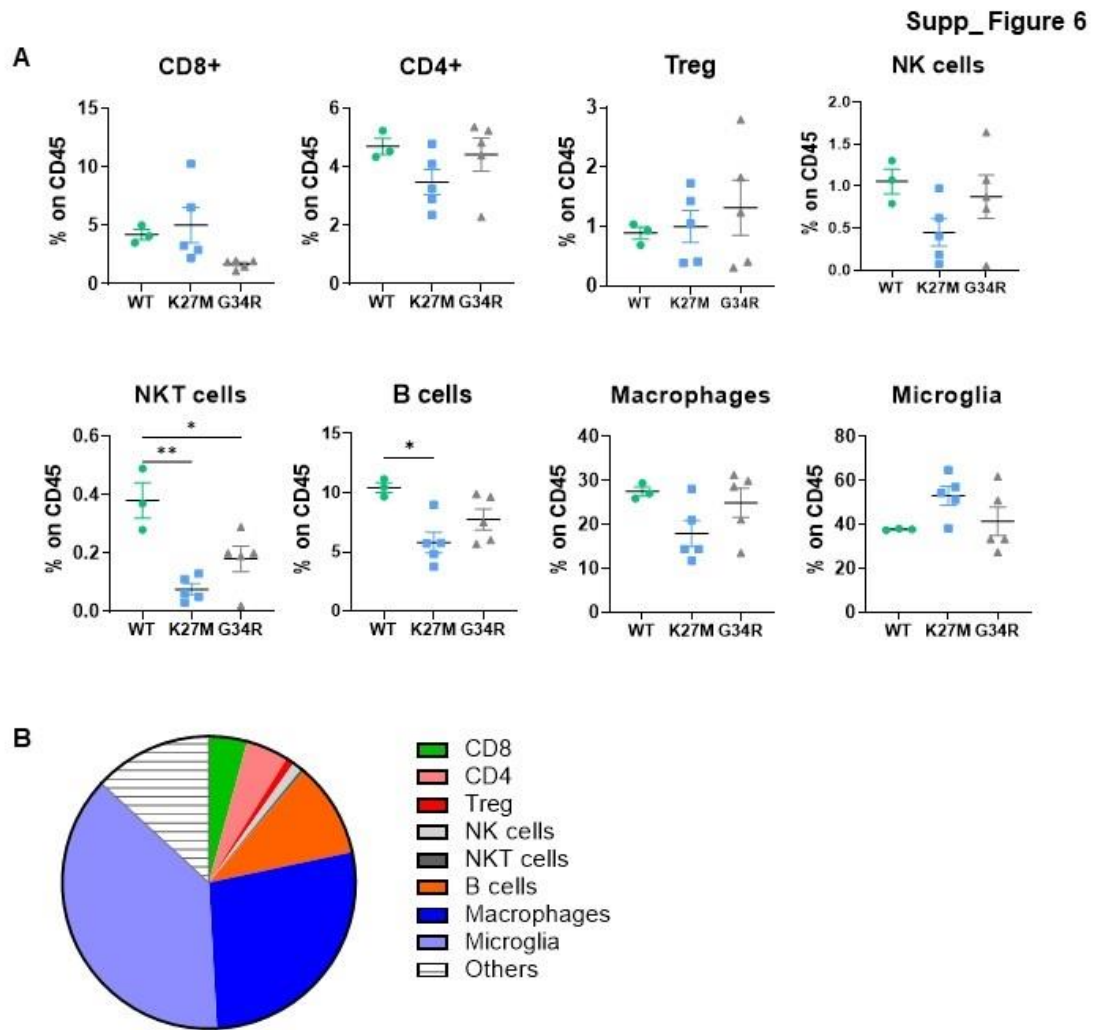

144

145

146 **Supplementary Figure 6. Analyses of the composition of TME in an isogenic model.**

147 (A) Flow cytometry analyses of different immune populations of tumors in an isogenic

148 system. Cells contain TP53 and PDGFR mutations in addition to H3 WT, H3K27M or

149 H3G34R mutations. Data are shown as percentage (%) on CD45+ immune cells. One-

150 way ANOVA was performed ( $N_{WT}=3$ ,  $N_{K27M,G34R}=5$ ). (B) Schematic representation of the

151 proportions of immune cell populations forming the TME. The median percentages of the

152 individuals of H3 WT group are shown.

153

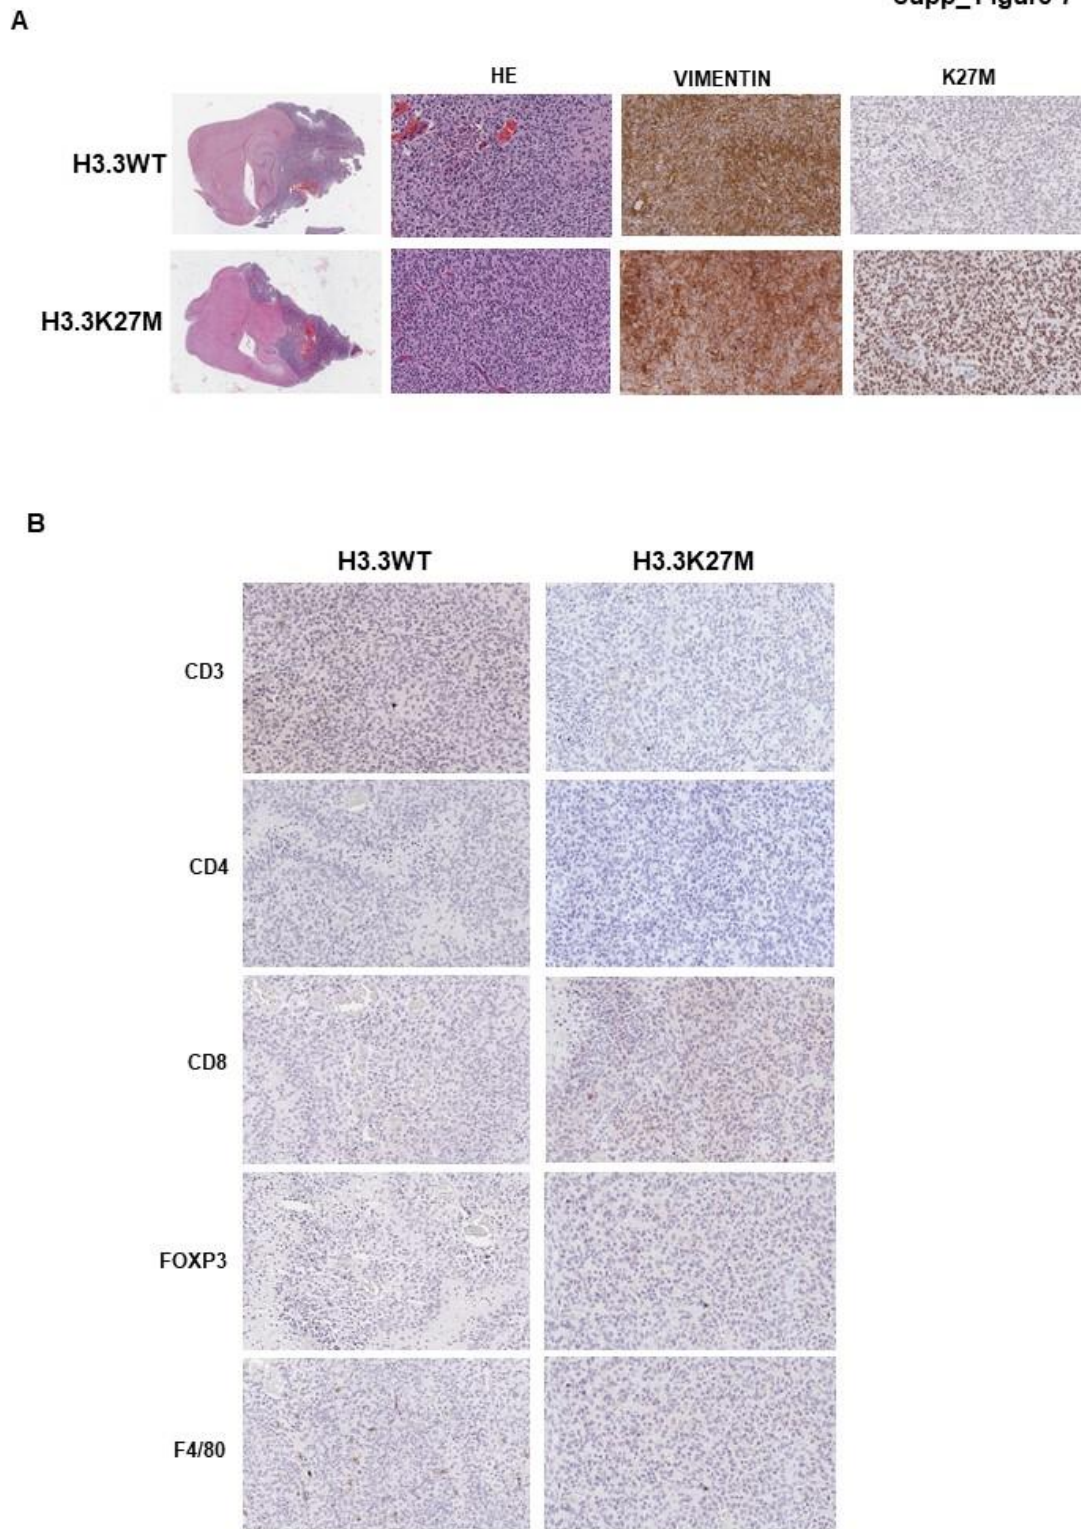

154  
155 **Supplementary Figure 7. Analyses of the composition of TME in an isogenic model.**  
156 (A) Representative micrographs (100  $\mu$ m) of spontaneous tumors arising from H3 WT or  
157 H3K27M transgenic mice. Showing H&E and H3 mutations and vimentin  
158 immunostaining. (B) Representative micrographs of spontaneous tumors arising from H3  
159 WT or H3K27M transgenic mice. Showing CD3, CD4, CD8, FOXP3 and F4/80  
160 immunostaining.
